# Supplementary material for: Selective hydrogenation of 5-HMF to 2,5-DMF over a magnetically recoverable non-noble metal catalyst
Source: Royal Society of Chemistry journal article supplement (doi:10.1039/c9gc03091c), 2019-01-01

## Electronic Supplementary Information

### Selective hydrogenation of 5-HMF to 2, 5- DMF over non-noble magnetically recoverable catalyst

#### Table of content

##### Table:

1. Table S.1: Basicity calculation by CO<sub>2</sub>-TPD analysis

##### Figures:

1. SAED Pattern of Cu-Fe (1:2) catalyst
2. XPS analysis of Carbon in Cu-Fe (1:2)-Used
3. CO<sub>2</sub>-TPD of all the screened catalysts
4. Py-IR of CuO<sub>x</sub>, FeO<sub>x</sub> ad Cu-Fe (1:2)
5. Colour change of Cu-Fe (1:2) during catalytic recyclability test
6. Mass fragment analysis of TGA-MS (a) m/z 18 for H<sub>2</sub>O (b) m/z 30 for NO

## Tables

**Table S.1:** Basicity calculation by CO<sub>2</sub>-TPD analysis

| Sr. No. | Catalysts        | Temperature Range (°C) |         |         | Total CO <sub>2</sub><br>desorbed |
|---------|------------------|------------------------|---------|---------|-----------------------------------|
|         |                  | 25-250                 | 250-500 | 500-750 |                                   |
| 1       | CuO <sub>x</sub> | 0.368                  | 0.0346  | 0.0097  | 0.4123                            |
| 2       | FeO <sub>x</sub> | 0.1574                 | 0       | 0       | 0.1574                            |
| 3       | Cu-Fe(1:1)       | 0.1665                 | 0.1592  | 0.0377  | 0.3634                            |
| 4       | Cu-Fe(2:1)       | 0.2996                 | 0       | 0.0023  | 0.3019                            |
| 5       | Cu-Fe (1:2)      | 0.1068                 | 0.0141  | 0.0035  | 0.1244                            |

## Figures

Figure SI 1: SAED Pattern of Cu-Fe (1:2) catalyst

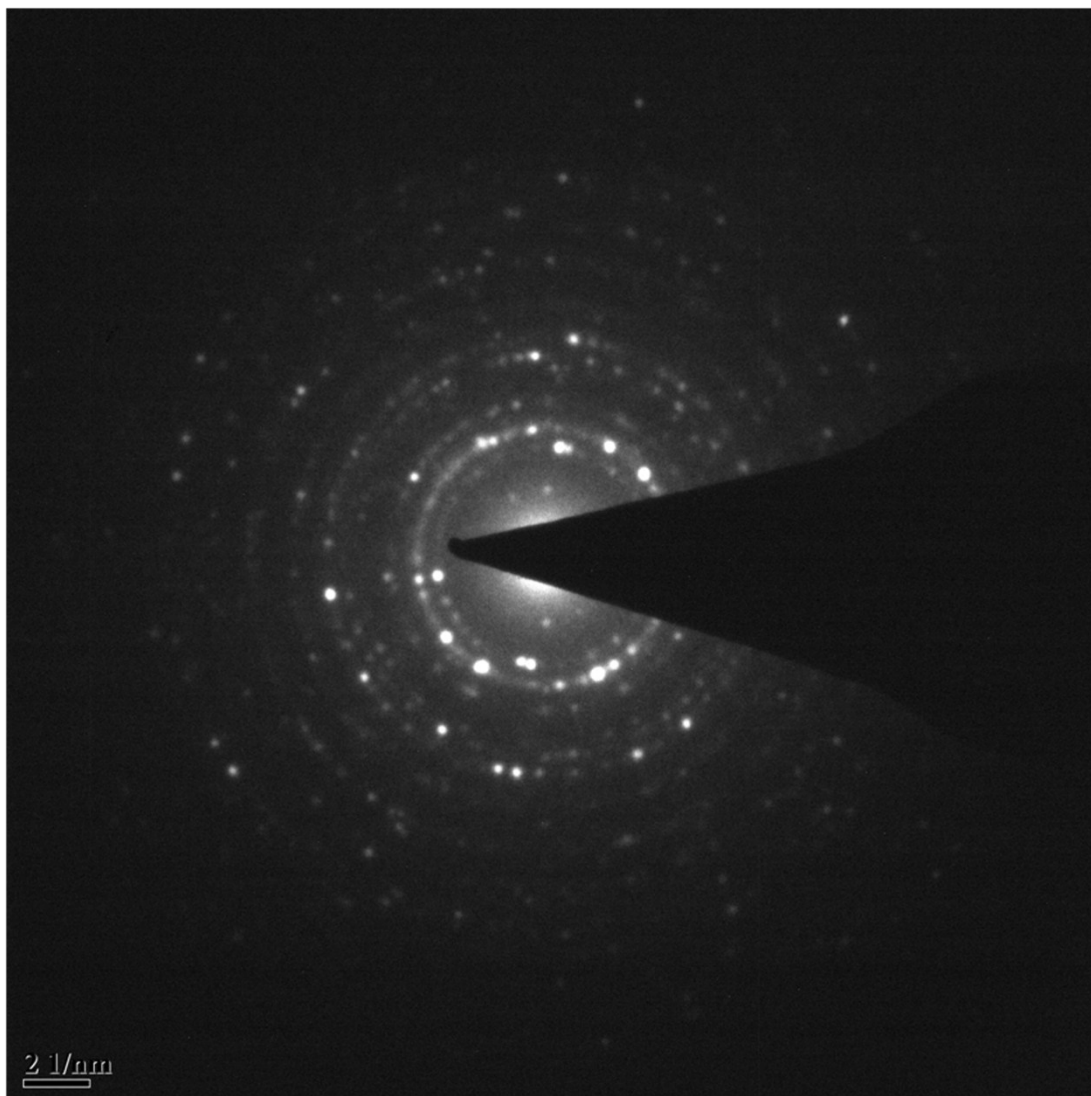

Figure SI 2: XPS analysis of Carbon in Cu-Fe (1:2)-Used

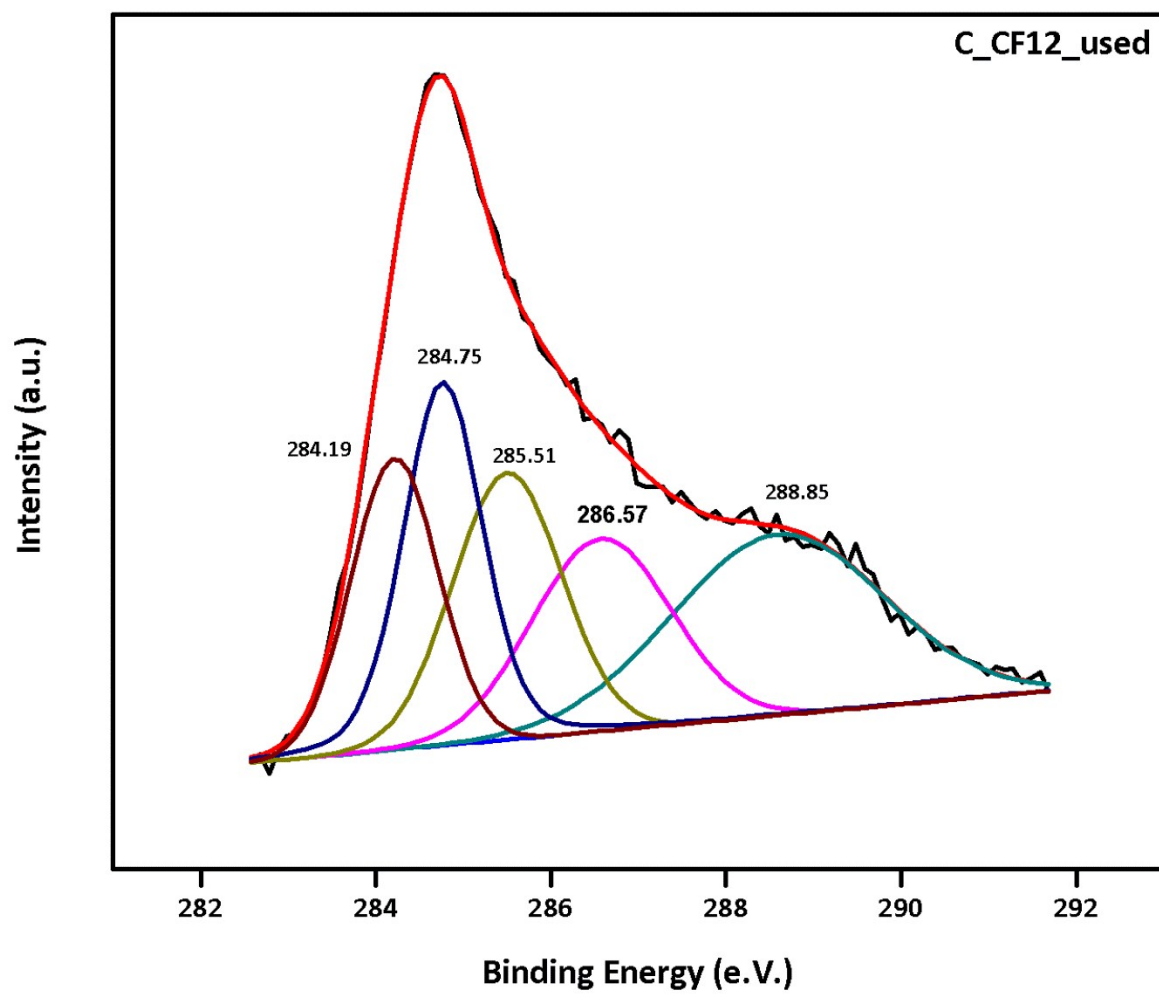

Figure SI 3: CO<sub>2</sub>-TPD of all the screened catalysts

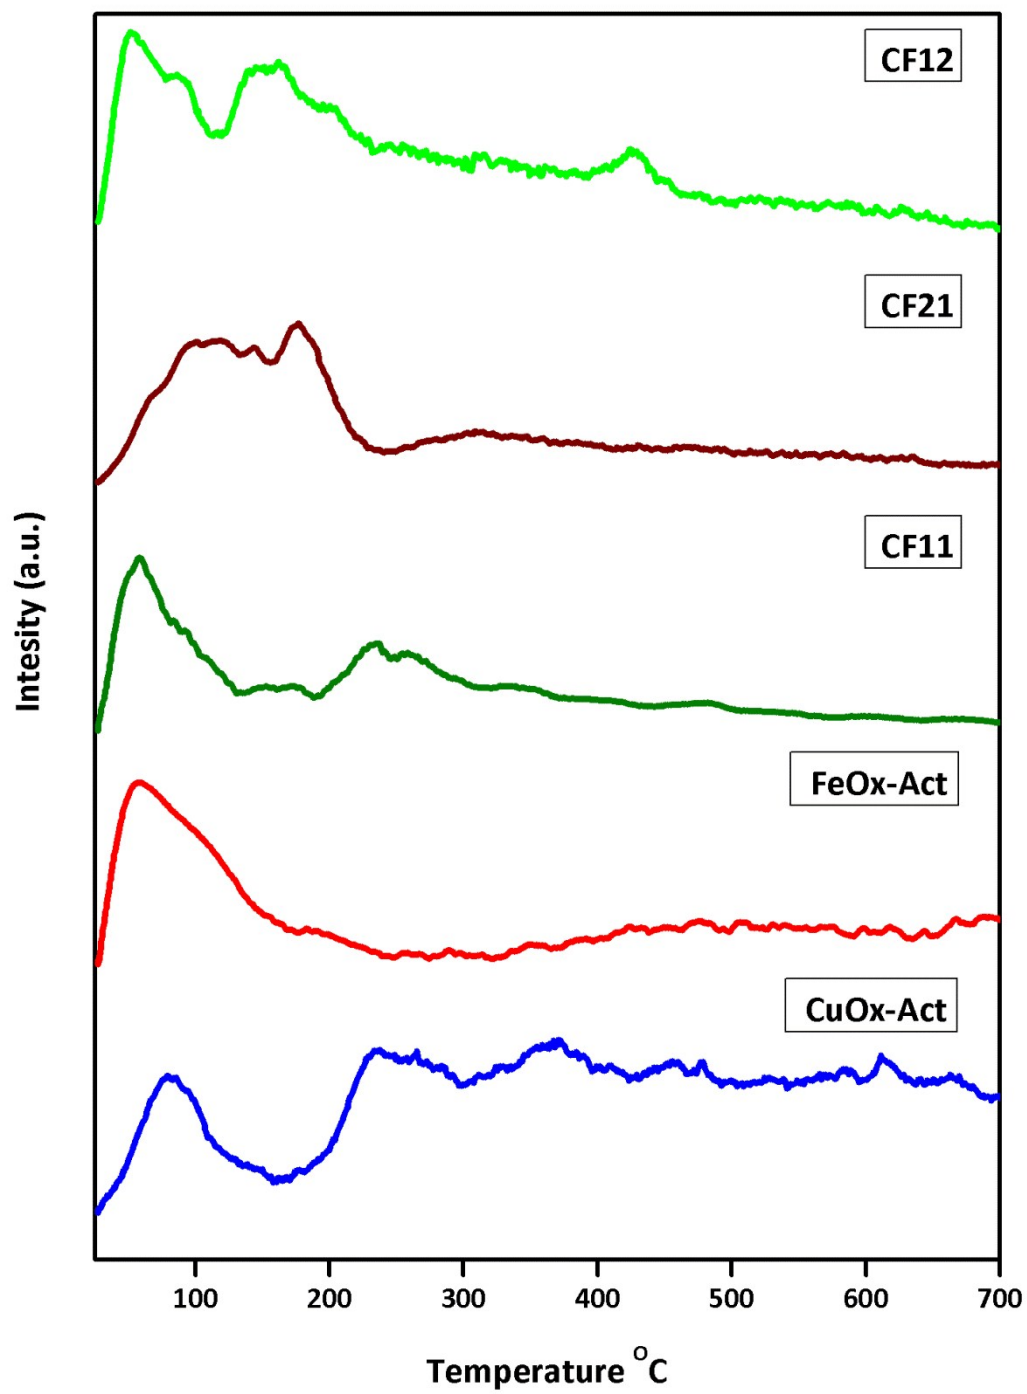

Figure SI 4: Py-IR of CuO<sub>x</sub>, FeO<sub>x</sub> ad Cu-Fe (1:2)

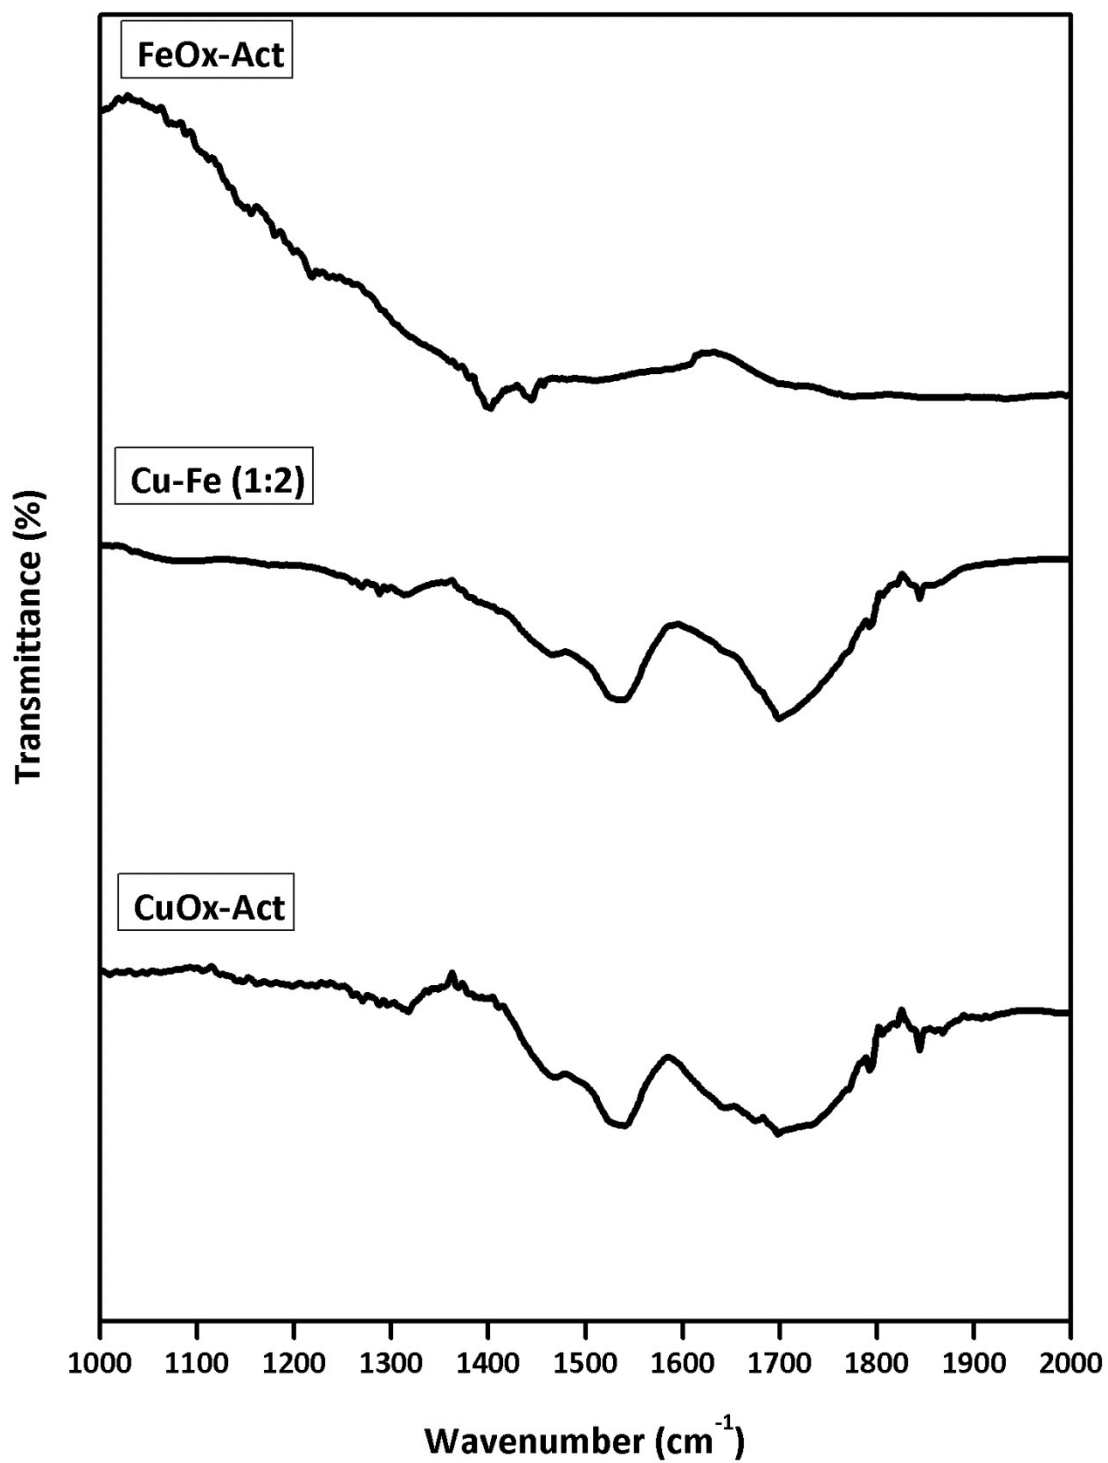

**Figure SI 5:** Colour change of Cu-Fe(1:2) during catalytic recyclability test (a) Cu-Fe (1:2)-fresh (b) Cu-Fe (1:2)-first recycle (c) Cu-Fe (1:2)- fifth recycle

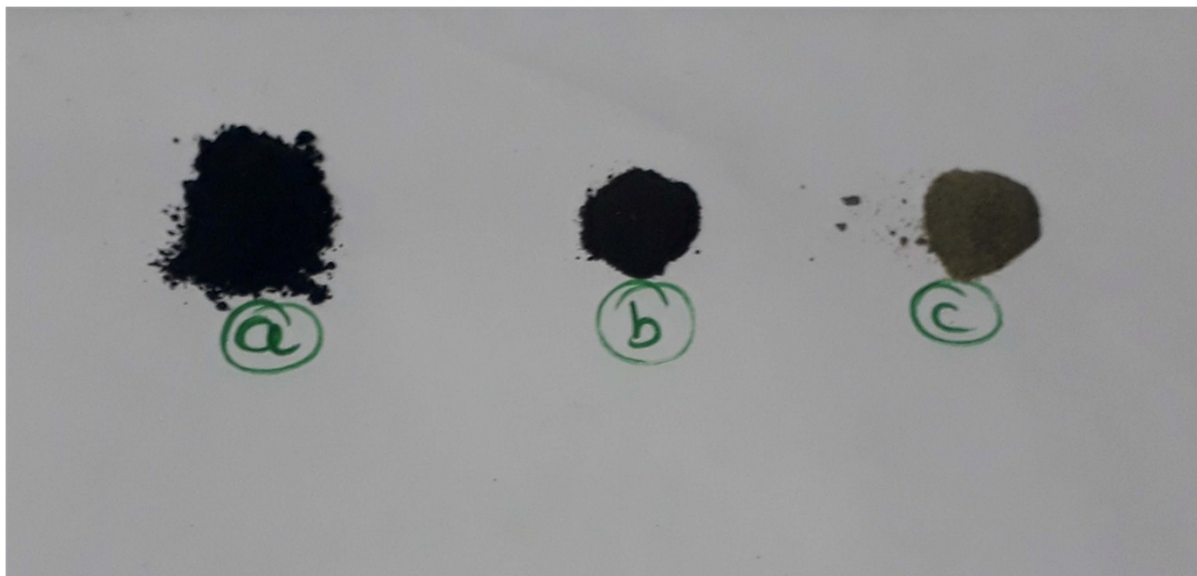

Figure SI 6: Mass fragment analysis of TGA-MS (a) m/z 18 for H<sub>2</sub>O (b) m/z 30 for NO

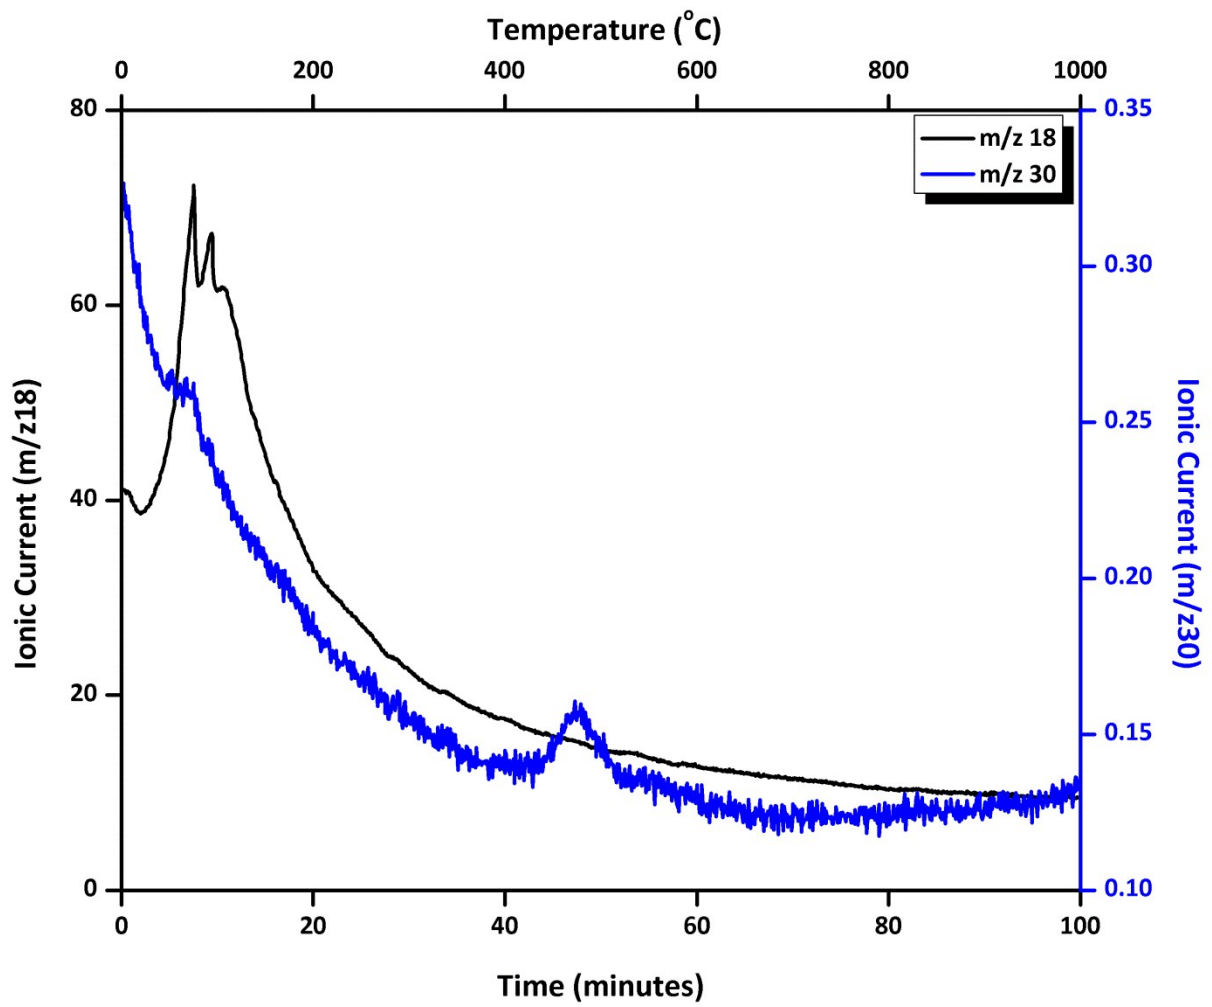

Supplement: c9gc03091c1.pdf [file c9gc03091c1.pdf]
